# Supplementary material for: Variation of key elements in soils and plant tissues in subalpine forests of the northern Rocky Mountains, USA
Source: Copernicus journal article supplement (doi:10.5194/bg-2018-443), 2018-11-15
Supplement: Supplementary file [file bg-2018-443-AC1-supplement.pdf]

Anonymous Referee #1

There are difficulties to read. The title does not specify the temporality of the study and that it focuses on the long term. Authors do not speak at all of the long-term effect of fires on the ground. Just at the beginning of the abstract you analyze the effect of wildfires in these key soil elements. Please modify your title according to your study including the role of "wildfires" in these key elements. And also something to long-term.

*We added "fire-affected" to the title. However, because we did not conduct a long-term study, we did not add the phrase "long-term" to the title. All samples were obtained in the period of a month. While we do investigate the past fire history (the early 20<sup>th</sup> century) of the sites, we did not conduct "long-term" research.*

The introduction is tedious and unstructured in some parts as in the last paragraph.

*We edited the introduction and last paragraph to simplify the text and explicitly state some of the key unknowns in the literature that we address with the study. In the third paragraph we added a new opening sentence to improve the transition. We revised the last paragraph to clearly state the objectives of the research.*

Without a structural logic or coherence in the "n" used in each case that varies from samples to subsamples and according to the elements analyzed.

*The use of "n" in the manuscript indicates the sample sizes used to calculate averages or confidence intervals. In the places where "n" may be ambiguous, we added figure calls to provide the source of our data in detail (see supplemental information). In line 120-121 we explain the discrepancies between "n" sample sizes between soil cores and vegetation samples. Our entire dataset is found in the main text and supplemental material.*

They provide information on soil properties that have not been analyzed.

*We are unsure what the reviewer means by this statement. We only describe the properties of soils in our results and discussion that have been analyzed and presented in Table 1 and S1. We welcome any clarification from the reviewer.*

Missing information about the study area.

*It is unclear what information is missing from the study area. We welcome suggestions from the reviewer as to what information should be added regarding the study area. We did add information on modern climate conditions, adding detail to the previous description.*

Failures in the experimental design, depth of sampling, without paper references to other papers with the same methodology.

*It is unclear what failures the reviewer is referring to with respect to experimental design. Due to variable depths of soils at the study sites, we sampled soil layers based on visual characteristics described in lines 128-131.*

The latter also occurs with laboratory analyzes where the description finds lack of scientific support and is chaotic. The MS must be bounded according to what is to be analyzed (the topic of the study) and from there to do it. Different depths, vegetation, years from the last wildfire are mixed, probably different soil type due to the length of the transect and the differences in the vegetation, areas of different severity of fire are mixed without knowing the prefire conditions and where it is assumed that it was of high severity but it is not said why and due to the heterogeneity of the severity in a fire, by the pulses of the fire, the authors try to synthesize without success the effects on which said severity depends but they do not detail in their study how the severity was in this case.

*We have added or highlighted text to better frame and describe the study. Soils are consistent across the study area and are characterized as shallow entisols (line 108). Soil horizon depths for sampling were determined visually in the field (lines 129-131). The years since the last known wildfire are listed in Table 1. Since the last fire in the study area occurred more than 100 years ago, detailed information about the degree of spatial heterogeneity of the fire is unknown. Therefore we relied on the published Fire Atlas from this region to determine the fire boundaries (see references). Additionally, we attempted to characterize pre-fire conditions by utilizing sampling sites where there have been no documented fires in the last ~110 years.*

They use ratios like the N / P without having analyzed P. It does not follow the same order of description of the elements in all the sections of the paper.

*We did analyze P. Specifically, we analyzed N and P in vegetation, which is stated in the methods and listed in Table S2. Since we structured the manuscript following the stated objectives in the introduction, we feel it does not make sense to restructure the paper around the presentation of elemental concentrations.*

Material and Methods Please provide information in "Study area" section about topography, soil type according to SSS or WRB, slope, aspect, mean annual temperature and precipitation, recent wildfires, etc.

*The soil types in the study area based on SSS (i.e. entisols)(line 108). Slope and aspect were added to Table 1. We added climate information (1912-2016 CE) from the nearby Western Regional Climate Center station at Haugan, Montana (station # 243984). Information about historical wildfires is included in Table 1.*

Lines 83-90 should be placed in "Study area".

*We feel that this section should remain in the introduction because it states the objectives of the manuscript.*

Authors appointed that there are 15 sampling areas but in line 103 appointed that there are 14.

*We thank the reviewer for catching this error. This was fixed in the text (line 103)*

Line 113: Why did you select this depth despite the low thermal conductivity of soil?? Please, add references where this experimental design was used to check the scientific validation of your study.

*Soil cores were approximately 25 cm long, depending on soil depth. Due to low thermal conductivity, we sampled soil horizons at three depths described in lines 127-131. This included litter and shallow organic soil horizons (<10 cm depth). This method is commonly used across many areas of soil research as described in the Standard Soil Methods for Long-Term Ecological Research textbook (Robertson et al. 1999), which we added to the methods text.*

If you are studying areas where the last wildfire was 100 years ago, why did you sample to 25 cm?

*We are slightly unsure of the reviewer's question. We applied commonly used soil sampling methods, sampling three depths in the soil core based on visual identification of the horizons: litter (unconsolidated plant material at the surface), organic (<10 cm), and mineral soils (10-25 cm depending on soil depth). The mineral horizon was analyzed to provide information on parent material contributing to soil formation.*

Line 114: How many cores did you select from each site? and how did you select the studied sites?

*One soil core was selected from each sample site (line 120). Study sites were selected as part of an ongoing study that is also investigating lake-sediment records; all sites are adjacent to a lake in subalpine forest (selected by elevation and forest type). The study area has a history of fire activity, throughout the 20<sup>th</sup> century and prior (e.g., known from lake-sediment records). Individual sampling locations at each lake were selected randomly from within 100 m of the lake edge.*

Lines 125 and 126: Then, as I can understand, you only took one sample from 0-10 cm depth. Why? This depth varies in each core? How can you know if the selected soils are from previously or after a wildfire? How many samples did you analyze from each depth?

*The organic horizon was identified visually (line 130) and sampled at varying depths between 0-10 cm based on the thickness of the horizon at the core site. Soils were not sampled based on an assessment of their origin before or after a wildfire; rather, they were sampled based on the visual transitions between horizons. We analyzed soil cores from all 15 sampling sites. At sites with soil cores, we analyzed one sample per soil*

*horizon (for a total of three, one each for each of three horizons) for multiple variables described in the methods section. It should be noted that only two horizons were analyzed at the Upper Oregon sample location because it did not contain a preserved organic soil horizon (see Table S1).*

Line 143: So then you did not use n=44? Please, clarify here and in study Fieldwork section how many samples you took from each area, depth, etc.

*It is unclear what sample size the reviewer is referring to since "n=44" is not found in line 143. We included all data used in our analysis in Table 1, Table S1, and Table S2. We took one sample from each of the three identified horizons in the soils cores described in lines 129-131 (except Upper Oregon, see table S1). All foliage samples taken from each sampling site can be found in Table S2.*

Line 146: As I can understand, then, all the soil elements do not have the same "n" value. Please clarify.

*It is unclear what the reviewer is referring to in this comment. All soil samples were analyzed for the same variables. We state in line 146 that soils were not analyzed for P.*

Results and discussion The discussion is scarce and poorly focused on MS topics.  
Conclusions The conclusions are appropriated to the MS.

*We improved the discussion to focus more on the manuscript topics. The results and discussion section are now organized to correspond with the objectives of the study clearly described in the introduction.*
